# Supplementary material
Source: PubMed Central journal article supplement (PMC4715211)

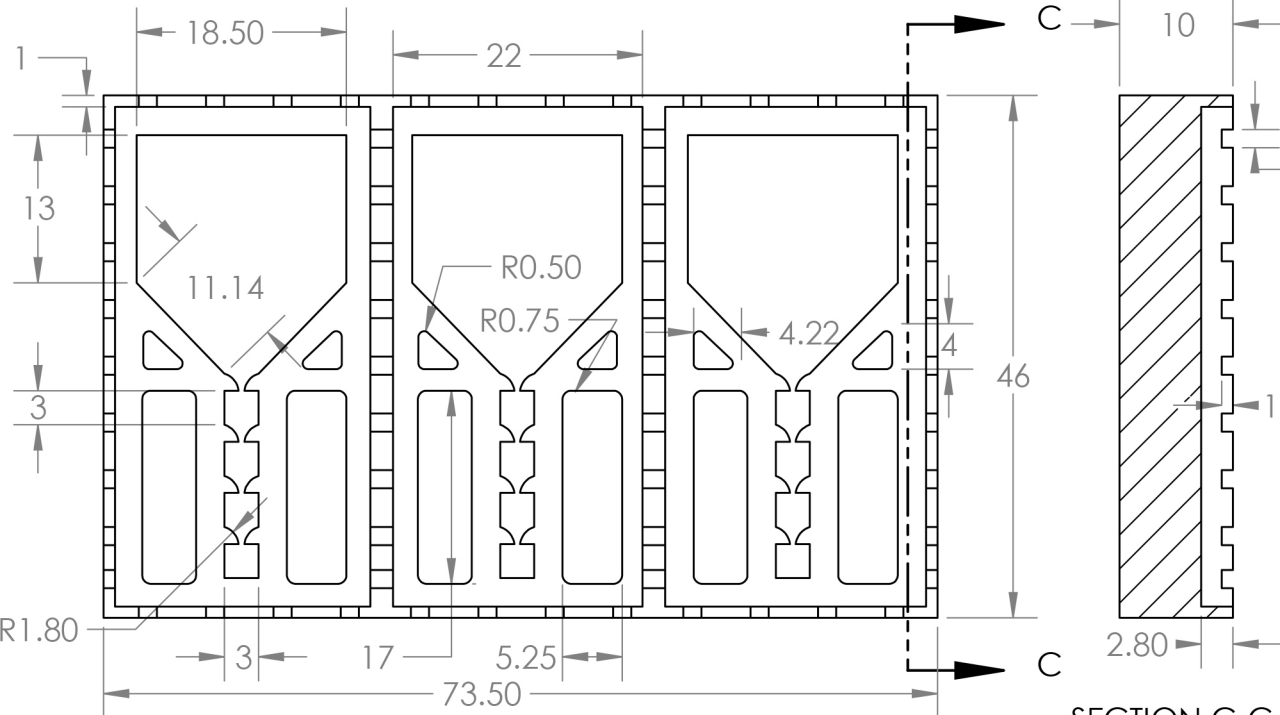

1.60  
 Arbitrary dimension.  
 Creates perforations to  
 easily separate devices.

SECTION C-C  
 SCALE 1.5 : 1

Supplement: mmc1.pdf [file mmc1.pdf]

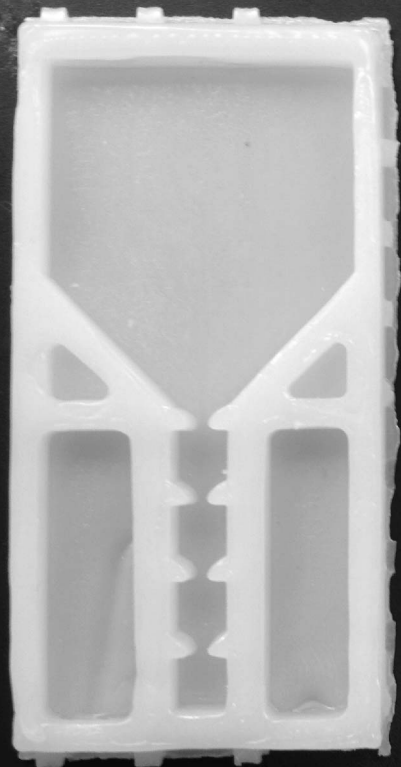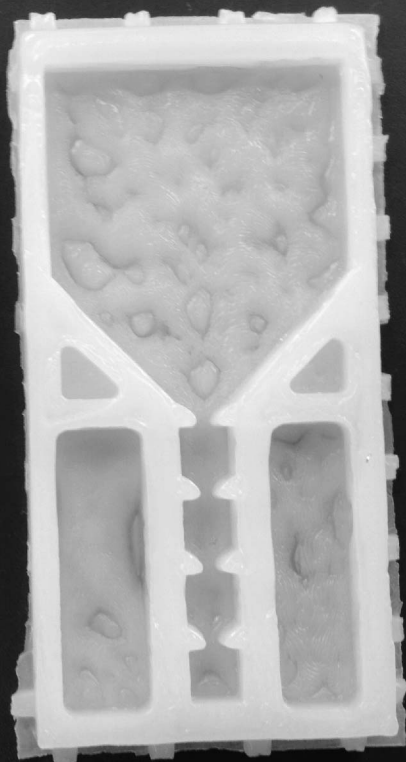

Supplement: mmc2.pdf [file mmc2.pdf]
